# Supplementary material
Source: Research Square preprint supplement (doi:10.21203/rs.3.rs-8785003/v1)
Supplement: Supplementary file 1 [file 7c20d53f122e2b0998e5fd7d.docx]

| Other Primary Tumors | 46 |
| --- | --- |
| RCC | 12 |
| Bladder | 3 |
| Urothelial | 3 |
| Salivary Gland | 1 |
| Choriocarinoma | 1 |
| Tracheal | 1 |
| Testicular | 1 |
| Adrenal | 1 |
| Skin Squamous | 4 |
| Cholangiocarcinoma | 1 |
| Adenoid | 2 |
| Parathyroid | 1 |
| Prostate | 1 |
| Parotid | 2 |
| Pancreatic | 2 |
| Vulva | 1 |
| Lower lip SCC | 1 |
| Xeroderma pigmentosum | 1 |
| Melanoma | 1 |
| GASTRIC | 1 |
| MPNST | 1 |
| Liver | 1 |
| Nasal | 2 |
| LARYNGEAL | 1 |
